# Supplementary material
Source: MDPI journal article supplement (https://www.mdpi.com/2071-1050/13/2/492)
Supplement: s1 [file s1]

## Sheet: Foglio1
A1	A2	A3	A4	A5	A6	A7	A8	A9	A10	B1	B2	B3	B4	B5	B6		ES1		ES2												SC1	S1
ID	Typology	Project name	ISTAT Code Region	ISTAT Code Province	ISTAT Code Municipality	Class - Rural Areas (Psn 2017)	Year of establishment	Natural Area	Ecosystem	Type of organization	Stakeholder	Type of initiative	Source of information	Target users	User experience of the forest/Access	Motivation -Effects			Activities and practices supported (Direct Benefits)												Scale (of action)	Status
																Physiological	Psychological	Social	sport	Recreation - tourism	Adventure / Widerness	Psycho-Physical Therapy/Rehabilitation	Relaxation/ Mindfullness	Spirituality	Social cohesion	Social Inclusion (social care)	Inspiation (artistic or cultural)	Learn from nature	livelihood provision-income diversification	Mixed / non specified
1	FT	Stazione di Terapia Forestale Valli del Natisone	6	30	30086	D	2015	Fixed (more than one)	Forest	Private-no profit	civil society/grass roots	Seasonal	Website	Specific target	Assisted	1	0	0	0	1	0	1	0	0	0	0	0	0	1	0	Regional	Active
2	SOCIAL	Food Forest Parco Nord Milano	3	15	15146	A	2020	Fixed (one)	Planted forest	Public	Mixed	Permanent	Personal contact	General public	Self-lead	0	1	1	0	1	0	0	0	0	1	0	0	0	1	0	Local	Design Phase
3	WELL	Dendroterapia energetica	8	37	37006	A	2007	Itinerant	mixed/non specified	Private-no profit	civil society/grass roots	Event	Website	General public	Assisted	0	1	1	0	0	0	1	1	1	0	0	0	0	0	0	Regional	Unknown
4	SOCIAL	Boschi Vivi	7	9	9063	D	2018	Fixed (one)	Forest	Private-no profit	civil society/grass roots	Permanent	Personal contact	Specific target	Assisted	0	0	1	0	0	0	0	0	1	0	0	0	0	0	0	Local	Design Phase
5	SOCIAL	Boschi Commemorativi - AIW	7	9	9040	D	2005	Fixed (more than one)	mixed/non specified	Private-no profit	civil society/grass roots	Network/Research	Website	General public	Self-lead	0	0	1	0	0	1	0	0	1	0	0	0	0	0	0	National	Unknown
6	SOCIAL	Diventare Alberi	8	37	37007	A	2015	Fixed (one)	Planted forest	Private-no profit	civil society/grass roots	Permanent	Website	Specific target	Assisted	0	0	1	0	0	0	0	0	1	0	0	0	0	0	0	Local	Design Phase
7	SI	Borgo Sociale di Roccabascerana	15	64	64078	C	2009	Fixed (one)	Forest	Private-no profit	Mixed	Permanent	Website	Special needs	Self-lead	0	0	1	0	0	0	0	0	0	1	1	0	0	0	0	Local	Active
8	ART	Bosco dei 100 Passi	3	15	15103	A	2005	Fixed (one)	Planted forest	Public-private	civil society/grass roots	Permanent	Website	General public	Self-lead	0	0	1	0	0	0	0	0	0	1	0	0	1	0	0	Local	Unknown
9	ART	Bosco dei Poeti	5	23	23031	D	2003	Fixed (one)	Forest	Private-no profit	civil society/grass roots	Permanent	Website	General public	Self-lead	0	0	1	0	0	0	0	0	1	0	0	1	0	0	0	Local	Active
10	ART	Arte Sella	4	22	22022	D	1986	Fixed (one)	Forest	Private-no profit	civil society/grass roots	Permanent	Website	General public	Both	0	1	1	0	1	0	1	0	0	0	0	1	0	0	0	Local	Active
11	ART	Selv Art	5	24	24085	D	2016	Fixed (one)	Forest	Private-no profit	civil society/grass roots	Permanent	Website	General public	Self-lead	0	0	1	0	1	0	0	0	0	0	0	1	0	0	0	Local	Active
12	FT	Equilibero Padova	5	28	28001	B	2008	Itinerant	mixed/non specified	Private-no profit	civil society/grass roots	Permanent	Personal contact	Special needs	Assisted	0	1	1	0	0	1	1	0	0	1	1	0	1	0	0	Regoinal	Active
13	EDU	I bimbi del bosco	5	28	28089	C	2016	Itinerant	Forest	Private-no profit	civil society/grass roots	Permanent	Personal contact	Specific target	Assisted	0	0	1	0	0	1	0	0	0	0	0	0	1	0	0	Local	Active
14	SI	Naturalmente Amici	5	28	28089	C	2019	Itinerant	Forest	Private-no profit	civil society/grass roots	Event/Project	Personal contact	Mixed/non specified	Assisted	1	1	1	0	0	1	0	0	0	1	1	0	1	0	0	Local	Active
15	SI	Slow Down	5	26	26006	D	2017	Itinerant	Forest	Private-no profit	Mixed	Event/Project	Personal contact	Special needs	Assisted	0	0	1	0	1	0	0	0	0	1	1	0	1	0	0	Regional	Abandoned
16	EDU	Amici dei Boschi	3	18	18110	A	1995	Fixed (one)	Forest	Private-no profit	civil society/grass roots	Permanent	Website	Specific target	Assisted	0	0	1	0	0	0	0	0	0	0	0	1	1	0	0	Local	Active
17	EDU	Bosco Didattico Selva Reale	16	72	72038	C	na	Fixed (one)	Forest	Private-business	civil society/grass roots	Permanent	Website	General public	Both	0	0	1	0	1	1	0	0	0	0	0	0	1	0	0	Local	Active
18	WELL	Bosco del Sorriso	1	96	96066	D	2012	Fixed (one)	Forest	Private-no profit	civil society/grass roots	Permanent	Personal contact	General public	Self-lead	1	1	1	0	1	0	1	1	0	0	0	0	1	0	0	Local	Active
19	WILD	Red Fox Natural Survival - marco Priori	10	55	55023	C	na	Itinerant	mixed/non specified	Private-business	civil society/grass roots	Permanent	Website	General public	Assisted	0	0	1	0	1	1	0	0	0	0	0	0	1	0	0	Local	Active
20	ART	Respirart	4	22	22196	D	na	Fixed (one)	mixed/non specified	Private-no profit	Mixed	Seasonal	Website	General public	Both	0	0	1	0	1	0	0	1	0	0	0	1	0	0	0	Local	Active
21	ART	Bosco Arte Stenico	4	22	22182	D	2011	Fixed (one)	Forest	Private-no profit	civil society/grass roots	Permanent	Website	General public	Self-lead	0	0	1	0	1	0	0	0	0	0	0	1	0	0	0	Local	Active
22	ART	Ledro Land Art	4	22	22229	D	2012	Fixed (one)	Forest	Public	Governance/public bodies	Permanent	Website	General public	Self-lead	0	0	1	0	1	0	0	0	0	0	0	1	0	0	0	Local	Active
23	ART	opera Bosco	12	56	56010	C	1996	Fixed (one)	Forest			Seasonal	Personal contact	General public	Self-lead	0	0	1	0	1	0	0	0	0	0	0	1	1	0	0	Local	Active
24	ART	BoscAsolo	5	26	26003	B	2014	Fixed (one)	Forest	Private-no profit	civil society/grass roots	Permanent	Website	General public	Self-lead	0	0	1	0	1	0	0	0	0	0	0	1	1	0	0	Local	Active
25	ART	Aeson	6	30	30038	B	2008	Itinerant	Park	Private-no profit	civil society/grass roots	Event	Personal contact	General public	Self-lead	0	0	1	0	0	0	0	0	0	1	0	1	1	0	0	Local	Active
26	ART	Sacro Bosco di Bomarzo	12	56	56009	C	1552	Fixed (one)	Forest	Private-business	civil society/grass roots	Permanent	Personal contact	General public	Self-lead	0	0	0	0	1	0	0	0	1	0	0	0	0	0	0	Local	Active
27	ART	Latemar.art - latemarium	4	22	22196	D	2014	Fixed (one)	mixed/non specified	Private-business	Mixed	Permanent	Website	General public	Self-lead	0	1	0	0	1	0	0	1	0	0	0	1	0	0	0	Local	Active
28	ART	Boschetto Larici - Latemarium	4	21	21059	D	2014	Fixed (one)	Forest	Private-business	Mixed	Permanent	Website	General public	Self-lead	1	0	0	1	1	0	0	1	0	0	0	1	0	0	0	Local	Active
29	WILD	Percorso Avventura - Latemarium	4	21	21059	D	2014	Fixed (one)	Forest	Private-business	Mixed	Permanent	Website	General public	Self-lead	1	0	0	1	1	1	0	0	0	0	0	0	0	0	0	Local	Active
30	EDU	Montagna Animata - Latemarium	4	22	22147	D	na	Fixed (one)	Forest	Private-business	Mixed	Permanent	Website	Specific target	Assisted	0	0	1	0	1	0	0	0	0	0	0	1	1	0	0	Local	Active
31	ART	Percorso Respiro degli Alberi	4	22	22102	D	2001	Fixed (one)	Forest	Public-private	Mixed	Permanent	Website	General public	Self-lead	0	1	1	0	1	0	0	1	1	0	0	1	0	0	0	Local	Active
32	ART	Percorso di Land Art Castello di Peraga	5	28	28100	B	2015	Fixed (one)	Park	Public-private	Mixed	Event	Website	Special needs	Self-lead	0	0	1	0	0	0	0	0	0	0	0	1	0	0	0	Local	Unknown
33	ART	Landart Campi Flegrei (2018 edition)	15	63	63060	A	2006	Fixed (one)	mixed/non specified	Private-no profit	civil society/grass roots	Event	Website	General public	Self-lead	0	0	1	0	0	0	0	0	0	1	0	1	0	0	0	Local	Active
34	ART	Lupanica	6	30	30064	B	2017	Fixed (one)	mixed/non specified	Public-private	Mixed	Event	Website	General public	Self-lead	0	0	0	0	1	0	0	0	0	0	0	1	0	0	0	Local	Unknown
35	WELL	Torrecchia vecchia - Forest Bathing	12	59	59005	B	2019	Fixed (one)	Forest	Private-no profit	civil society/grass roots	Permanent	Website	General public	Assisted	0	0	0	1	1	0	0	0	1	0	0	0	1	0	0	Local	Active
36	WELL	Bosco del Respiro	5	26	26086	A	na	Fixed (one)	Planted forest	Private-no profit	Mixed	Permanent	Website	Special needs	Self-lead	1	0	1	0	1	0	1	0	0	1	0	0	0	0	0	Local	Active
37	WELL	Parco del Respiro	4	22	22081	D	2019	Fixed (one)	Forest	Private-no profit	civil society/grass roots	Permanent	Website	General public	Self-lead	1	1	0	0	1	0	0	1	0	0	0	0	0	0	0	Local	Active
38	WELL	Excelsior Dolomites Life Resort	4	21	21047	D	na	Itinerant	Forest	Private-business	civil society/grass roots	Permanent	Website	General public	Assisted	1	0	0	0	1	0	0	1	0	0	0	0	0	0	0	Local	Active
39	WELL	Hotel Miramonti	4	21	21005	D	2018	Fixed (one)	Forest	Private-business	civil society/grass roots	Permanent	Website	General public	Assisted	1	1	0	0	1	0	1	1	0	0	0	0	1	0	0	Local	Active
40	WELL	Ledro Mountain Chalet	4	22	22014	D	na	Fixed (one)	Forest	Private-business	civil society/grass roots	Seasonal	Website	General public	Self-lead	1	1	0	0	1	0	0	1	0	0	0	0	0	0	0	Local	Active
41	WELL	Adler Lodge Ritten	4	21	21072	D	na	Fixed (one)	mixed/non specified	Private-business	civil society/grass roots	Permanent	Website	General public	Assisted	1	1	0	0	1	0	0	1	0	0	0	0	0	0	0	Local	Active
42	WELL	Alto Adige Balance	4	21	21008	A	na	Fixed (more than one)	mixed/non specified	Private-no profit	Mixed	Network/Research	Personal contact	General public	NA	1	1	1	1	1	1	0	1	0	1	0	1	1	0	0	Regional	Active
43	WELL	Kilometro Inverso	9	48	48017	na	2017	Itinerant	Forest	Private-business	civil society/grass roots	Permanent	Website	Specific target	Assisted	1	1	0	0	1	1	0	1	0	0	0	0	0	0	0	Regonal	Active
44	WELL	Rosewood Castiglion del Bosco	9	52	52014	C	2020	Fixed (one)	Park	Private-business	civil society/grass roots	Event	Website	Specific target	Assisted	1	1	0	0	1	0	0	1	1	0	0	0	0	0	0	Local	Active
45	WELL	Castello di Cafaggio	9	48	48022	C	na	Fixed (one)	mixed/non specified	Private-business	civil society/grass roots	Seasonal	Website	General public	Assisted	1	1	0	0	0	0	0	1	1	0	0	0	0	0	0	Local	Active
46	WELL	Forest Bathing	5	25	25003	D	na	Itinerant	Forest	Private-business	civil society/grass roots	Event	Website	General public	Assisted	1	1	0	0	1	0	0	1	0	0	0	0	0	0	0	Regional	Abandoned
47	WELL	Erlebnishotel Waltershof	4	21	21015	D	2019	Itinerant	Forest	Private-business	civil society/grass roots	Seasonal	Website	Specific target	Assisted	1	1	0	0	1	0	0	1	0	0	0	0	0	0	0	Local	Active
48	WELL	Trekking Alps	1	1	1272	A	2012	Itinerant	Forest	Private-business	civil society/grass roots	Seasonal	Website	General public	Assisted	1	1	0	0	1	1	0	1	0	0	0	0	0	0	0	Regional	Active
49	WELL	Tratterhof	4	21	21074	na	na	Itinerant	Forest	Private-business	civil society/grass roots	Permanent	Website	Specific target	Assisted	1	1	0	0	1	0	0	1	0	0	0	0	0	0	0	Local	Active
50	WELL	Falkensteiner Hotel & Spa Falkensteinerhof	4	21	21117	D	na	Fixed (one)	mixed/non specified	Private-business	civil society/grass roots	Seasonal	Website	General public	Assisted	1	0	0	0	1	0	0	1	0	0	0	0	0	0	0	Local	Unknown
51	WELL	CASA AHIMSA - FOREST THERAPY	12	58	58091	A	2019	Itinerant	mixed/non specified		civil society/grass roots	Permanent	Website	General public	Assisted	0	1	0	0	0	0	0	1	1	0	0	0	0	0	0	Local	Active
52	WELL	Partschins	4	21	21062	D	na	Itinerant	Forest	Private-no profit	Mixed	Network/Research	Website	General public	NA	1	1	0	1	1	1	0	1	0	0	0	0	0	0	0	Local	Active
53	FT	Terapia Forestale Pian dei Termini	9	47	47024	na	2019	Fixed (one)	Forest	Public-private	Mixed	Research/Forum	Personal contact	General public	Both	1	1	0	0	0	0	1	1	0	0	0	0	0	0	0	Local	Pilot
54	EDU	Educare nel Bosco - Canale Scuola	4	21	21009	A	2015	-	mixed/non specified	Private-business	civil society/grass roots	Research/Forum	Grey literature	Specific target	Assisted	0	1	1	0	0	1	0	0	0	0	0	0	1	1	0	National	Active
55	EDU	Asilo Sole e Terra	12	58	58065	A	na	Fixed (one)	Park	Public	civil society/grass roots	Permanent	Website	Specific target	Assisted	0	1	1	0	0	1	0	0	0	1	0	1	1	0	0	Local	Active
56	EDU	progetto Asilo nel Bosco - Scuola La Vecchia Fattoria	12	58	58091	A	2017	Fixed (one)	mixed/non specified	Private-business	civil society/grass roots	Permanent	Website	Specific target	Assisted	0	1	1	0	0	1	0	0	0	0	0	0	1	0	0	Local	Active
57	WELL	Il Bosco Incantato	1	4	4156	D	2010	Fixed (one)	Forest	Private-business	civil society/grass roots	Seasonal	Website	General public	Both	0	1	1	0	1	0	0	1	0	0	0	1	1	0	0	Local	Active
58	SOCIAL	Food Forest Picasso	8	34	34027	B	2012	Fixed (one)	Planted forest	Private-no profit	civil society/grass roots	Permanent	Website	General public	Self-lead	1	0	1	0	1	0	0	0	0	1	0	0	1	1	0	Local	Active
59	SOCIAL	Food Forest Cascinet	3	15	15146	A	2015	Fixed (one)	Planted forest	Private-no profit	civil society/grass roots	Permanent	Personal contact	General public	Both	1	0	1	0	1	0	0	0	0	1	0	0	1	1	0	Local	Active
60	WELL	Mindfullness cascinet	3	15	15146	A	2020	Fixed (one)	Planted forest	Private-no profit	civil society/grass roots	Event	Personal contact	General public	Assisted	0	1	1	0	0	0	0	1	0	1	0	0	0	0	0	Local	Active
61	ART	ArteNatura - Bosco Nordio	5	27	27008	B	2019	Fixed (one)	Forest	Public	Academic/tecnical bodies	Seasonal	Personal contact	General public	Both	0	1	1	0	0	0	0	1	0	0	0	1	1	0	0	Local	Active
62	ART	Il Bosco dell'Arte	5	26	26030	B	2017	Fixed (one)	mixed/non specified	Private-business	civil society/grass roots	Permanent	Website	General public	Both	0	0	1	0	0	0	0	0	0	0	0	1	1	0	0	Local	Active
63	ART	Humus Park	6	93	93033	A	2016	Fixed (more than one)	mixed/non specified	Public	Governance/public bodies	Event	Website	General public	Both	0	0	1	0	0	0	0	0	0	0	0	1	0	0	0	Regional	Active
64	WELL	Campo Base - ROUTE THERAPY	5	24	24057	B	2001	Itinerant	mixed/non specified	Private-business	civil society/grass roots	Seasonal	Personal contact	Special needs	Assisted	0	1	1	0	0	1	1	0	0	1	1	0	0	0	0	Regional	Unknown
65	WELL	Matrimoni nel Bosco	12	56	56059	A	na	Fixed (one)	Planted forest	Private-business	civil society/grass roots	Event	Website	Specific target	Both	0	0	1	0	0	0	0	0	1	0	0	0	0	0	0	Local	Active
66	WELL	Parco dei Cinque Sensi	12	56	56060	C	na	Fixed (one)	Forest	Private-no profit	civil society/grass roots	Seasonal	Website	General public	Both	0	1	1	0	1	1	0	1	1	0	0	0	1	0	0	Local	Active
67	WELL	Percorso Iniziatico - Bosco Esoterico e Letterario di Montecchio	12	56	56060	A	2017	Fixed (one)	Forest	Private-no profit	civil society/grass roots	Event	Personal contact	General public	Assisted	0	0	1	0	0	0	0	0	1	0	0	1	0	0	0	Local	Unknown
68	SOCIAL	Briganti di Cerreto	8	35	35019	D	na	Fixed (one)	Forest	Private-no profit	civil society/grass roots	Permanent	Grey literature	General public	Self-lead	0	0	1	0	1	0	0	0	0	1	0	0	0	1	0	Local	Active
69	EDU	Aesthetica - scuola per guide forest therpay	na	na	na	na	na	Itinerant	mixed/non specified	Private-business	civil society/grass roots	Network/Research	Website	General public	NA	0	1	0	0	0	0	0	1	1	0	0	0	0	1	0	International	Active
70	SI	programma di inclusione sociale in favore di soggetti sottoposti a misure penali	20	91	91101	D	2016	Itinerant	Forest	Public-private	Mixed	Event	Website	Special needs	Assisted	0	0	1	0	0	0	0	0	0	0	1	0	0	0	0	Regional	Active
71	WELL	Forest Care: il bosco che cura	16	71	71006	D	2019	Fixed (one)	Forest	Private-business	civil society/grass roots	Event	Website	Specific target	Assisted	0	1	0	0	0	0	1	1	0	0	1	0	0	0	0	Local	Active
72	WILD	Daunia Avventura	16	71	71007	D	na	Fixed (one)	Forest	Private-business	civil society/grass roots	Permanent	Website	General public	Both	0	0	0	1	1	1	0	1	0	0	0	0	1	0	0	Local	Active
73	EDU	Archibio	8	37	37025	C	na	Itinerant	mixed/non specified	Private-business	civil society/grass roots	Network/Research	Website	General public	Assisted	1	0	0	0	0	0	0	0	0	0	0	0	1	1	0	National	Active
74	WELL	Yoga e Bosco	11	41	41044	A	2015	Itinerant	Forest	Private-no profit	civil society/grass roots	Event	Website	Specific target	Assisted	0	1	1	0	0	0	0	1	0	0	0	0	1	0	0	Local	Unknown
75	WELL	Bosco delle Viole	5	26	26037	B	1995	Fixed (one)	Planted forest	Private-business	civil society/grass roots	Permanent	Personal contact	General public	Assisted	0	0	1	0	0	0	0	1	0	0	0	1	1	1	0	Local	Active
76	WELL	Trekking di Meditazione	20	91	91010	D	2004	Itinerant	Forest	Private-no profit	civil society/grass roots	Event	Website	General public	Assisted	0	1	0	1	0	0	0	1	1	0	0	0	0	0	0	Local	Unknown
77	WELL	Tentsile Experience Camp - Il nido nel Parco	3	18	18177	B	na	Fixed (one)	Forest	Private-business	civil society/grass roots	Permanent	Website	General public	Self-lead	0	1	1	0	1	1	0	1	0	0	0	0	0	0	0	Local	Active
78	ART	PERCOSRI D'ARTE IN NATURA DI TERI VOLIN	17	76	79123	D	2017	Fixed (one)	Forest	Private-no profit	Mixed	Event	Website	General public	Self-lead	0	0	1	0	0	0	0	0	0	0	0	1	0	0	0	Local	Abandoned
79	ART	Parco di Negombo - aRTE cONTEMPORANEA	15	63	63038	A	na	Fixed (one)	mixed/non specified	Private-business	civil society/grass roots	Network/Research	Website	General public	Self-lead	0	0	0	0	1	0	0	0	0	0	0	1	0	0	0	Local	Active
80	ART	Museo d'Arte Moderna Pagani	3	12	12042	A	1957	Fixed (one)	mixed/non specified	Private-business	civil society/grass roots	Permanent	Website	General public	Both	0	0	1	0	0	0	0	0	0	0	0	1	0	0	0	Local	Active
81	ART	la Serpara	12	56	56022	C	2000	Fixed (one)	mixed/non specified	Private-no profit	civil society/grass roots	Permanent	Website	General public	Both	0	0	1	0	1	0	0	0	0	0	0	1	0	0	0	Local	Active
82	ART	fIUME d'Arte	3	17	17125	B	2017	Fixed (one)	Park	Public	Governance/public bodies	Permanent	Website	General public	Self-lead	0	0	1	0	1	0	0	0	0	0	0	1	1	0	0	Regional	Unknown
83	ART	Parco del Sojo	5	24	24054	D	na	Fixed (one)	Forest	Private-business	civil society/grass roots	Seasonal	Website	General public	Both	0	0	0	0	0	0	0	0	0	0	0	1	0	0	0	Local	Active
84	ART	We Were Here	8	34	34024	C	2016	Fixed (one)	Forest	Public	Mixed	Permanent	Website	General public	Self-lead	0	0	0	0	1	0	0	0	0	0	0	1	0	0	0	Regional	Active
85	ART	Parco sculture del Chianti	9	52	52006	C	2004	Fixed (one)	Forest	Private-no profit	civil society/grass roots	Permanent	Website	General public	Both	0	0	0	0	1	0	0	0	0	0	0	1	0	0	0	Local	Active
86	ART	Collezione Gori	9	47	47014	A	1982	Fixed (one)	mixed/non specified	Private-business	civil society/grass roots	Permanent	Website	General public	Assisted	0	0	1	0	1	0	0	0	0	0	0	1	0	0	0	Local	Active
87	ART	Giardino dei Tarocchi	9	47	47012	B	1996	Fixed (one)	mixed/non specified	Private-no profit	civil society/grass roots	Permanent	Personal contact	General public	Self-lead	0	0	0	0	1	0	0	0	0	0	0	1	0	0	0	Local	Active
88	ART	Bosco delle Meraviglie	1	1	1255	A	2016	Fixed (one)	Forest	Private-business	civil society/grass roots	Permanent	Website	Specific target	Assisted	0	0	1	0	1	1	0	0	0	0	0	1	0	0	0	Local	Active
89	ART	Giardino di Daniel Spoerri	9	53	53025	D	1997	Fixed (one)	mixed/non specified	Private-no profit	civil society/grass roots	Seasonal	Personal contact	General public	Self-lead	0	0	1	0	0	0	0	0	0	0	0	1	0	0	0	Local	Active
90	ART	Eco Land Art Valle del Sagittarrio	13	66	66103	D	2008	Fixed (more than one)	mixed/non specified	Private-no profit	civil society/grass roots	Event	Website	General public	Self-lead	0	1	1	0	1	0	0	0	0	0	0	1	0	0	0	Regional	Unknown
91	ART	Land(e)scape	8	35	35013	C	2017	Fixed (more than one)	Forest	Public-private	Mixed	Event	Website	General public	Both	0	0	1	0	1	0	0	1	0	0	0	1	0	0	0	Regional	Unknown
92	ART	Arte nel Bosco – WaldWunderland – Foresta delle meraviglie	3	16	16078	C	2014	Fixed (one)	Forest	Public-private	Mixed	Event	Website	General public	Both	0	0	1	0	1	0	0	0	0	0	0	1	0	0	0	Local	Abandoned
93	ART	Sentiero dell'Amicizia - Abetone	9	47	47001	D	2013	Fixed (one)	Forest	Public-private	Mixed	Event	Website	General public	Self-lead	0	0	1	0	1	0	0	0	0	0	0	1	1	0	0	Local	Unknown
94	ART	Giardino delle formiche - sentiero degli artisti	5	25	25019	D	na	Fixed (one)	Forest	Private-business	civil society/grass roots	Permanent	Website	General public	Self-lead	0	0	0	0	1	0	0	0	0	0	0	1	1	0	0	Local	Active
95	WELL	Il bardo	1	4	4227	D	na	Itinerant	mixed/non specified	Private-no profit	civil society/grass roots	Event	Website	General public	Assisted	0	0	1	0	0	0	0	1	1	0	0	0	0	0	0	Local	Active
96	EDU	Forest Coaching and Forest Bathing	3	16	16219	B	2019	Itinerant	mixed/non specified	Private-business	civil society/grass roots	Permanent	Website	General public	Assisted	0	0	1	0	0	0	0	1	0	0	0	0	1	1	0	National	Active
97	WELL	Nature Hotel Rainer	4	21	21070	D	na	Itinerant	mixed/non specified	Private-business	civil society/grass roots	Seasonal	Website	Specific target	Assisted	1	1	0	0	1	0	0	1	0	0	0	0	0	0	0	Local	Unknown
98	WELL	Hotel das stachelburg	4	21	21062	D	2018	Itinerant	Forest	Private-business	civil society/grass roots	Permanent	Website	Specific target	Assisted	1	1	0	0	1	0	0	1	0	0	0	0	0	0	0	Local	Active
99	WELL	Alphotel Stocker	4	21	21017	D	na	-	Forest	Private-business	civil society/grass roots	Seasonal	Website	Specific target	Assisted	1	1	0	0	1	0	0	1	0	0	0	0	0	0	0	Local	Unknown
100	WELL	Hotel Europa	4	21	21019	D	na	Itinerant	Forest	Private-business	civil society/grass roots	Permanent	Website	Specific target	Assisted	1	1	0	0	1	0	0	1	0	0	0	0	0	0	0	Local	Active
101	WELL	Hotel Belvedere	4	21	21056	D	na	-	Forest	Private-business	civil society/grass roots	Seasonal	Website	Specific target	Assisted	1	1	0	0	1	0	0	1	0	0	0	0	0	0	0	Local	Unknown
102	WELL	Hotel Golserhof	4	21	21101	D	na	-	Forest	Private-business	civil society/grass roots	Seasonal	Website	Specific target	Assisted	1	1	0	1	1	0	0	1	0	0	0	0	0	0	0	Local	Active
103	WELL	Taubers Unterwirt Aktiv & Vitalhotel	4	21	21116	D	na	-	Forest	Private-business	civil society/grass roots	Permanent	Website	Specific target	Assisted	1	1	0	1	1	0	0	1	0	0	0	0	0	0	0	Local	Unknown
104	WELL	Alpin & Relax Hotel Das Gerstl	4	21	21046	D	na	Fixed (one)	Forest	Private-business	civil society/grass roots	Seasonal	Website	Specific target	Assisted	1	1	0	1	1	0	0	1	0	0	0	0	0	0	0	Local	Active
105	WELL	Hotel Lüsnerhof	4	21	21044	D	na	Fixed (one)	Forest	Private-business	civil society/grass roots	Seasonal	Website	Specific target	Assisted	1	1	0	0	1	0	0	1	0	0	0	0	0	0	0	Local	Active
106	WELL	Hotel Gassenhof	4	21	21070	D	2018	-	Forest	Private-business	civil society/grass roots	Seasonal	Website	Specific target	Assisted	1	1	0	0	1	0	0	1	0	0	0	0	0	0	0	Local	Active
107	WELL	Vitalpina Hotel Icaro	4	21	21019	D	na	-	mixed/non specified	Private-business	civil society/grass roots	Seasonal	Website	Specific target	Assisted	1	1	0	0	1	0	0	1	0	0	0	0	0	0	0	Local	Unknown
108	WELL	Hotel Erzherzog Johann	4	21	21087	D	2018	Itinerant	Forest	Private-business	civil society/grass roots	Seasonal	Website	Specific target	Assisted	1	1	0	1	1	0	0	1	0	0	0	0	0	0	0	Local	Active
109	WELL	Vitalpina Hotel Magdalenahof	4	21	21109	D	na	-	Forest	Private-business	civil society/grass roots	Seasonal	Website	Specific target	NA	1	1	0	0	1	0	0	1	0	0	0	0	0	0	0	Local	Active
110	WELL	Passeggiate Zen	4	21	21092	D	2020	-	mixed/non specified	Private-business	civil society/grass roots	Seasonal	Website	General public	Assisted	0	0	1	0	1	0	0	1	0	0	0	0	0	0	0	Local	Unknown
111	WELL	Relaxation Programme - Cyprianerhof	4	21	21100	D	na	Itinerant	mixed/non specified	Private-business	civil society/grass roots	Seasonal	Website	General public	Both	1	1	0	1	1	0	0	1	0	0	0	0	0	0	0	Local	Active
112	WELL	Forest SPA	4	21	21079	D	na	Fixed (one)	Forest	Private-business	civil society/grass roots	Permanent	Website	General public	Both	1	1	0	0	1	0	0	1	0	0	0	0	0	0	0	Local	Active
113	EDU	Bosco didattico di Castelleone	3	19	19025	B	1987	Fixed (one)	Forest	Public	Governance/public bodies	Permanent	Website	General public	Assisted	0	0	1	0	1	0	0	0	0	0	0	1	1	0	0	Regional	Active
114	EDU	Bosco didattico e museo della pietra di zovencedo	5	24	24121	B	2013	Fixed (one)	Forest	Public	Governance/public bodies	Permanent	Website	General public	Assisted	0	0	1	0	1	0	0	0	0	0	0	1	1	0	0	Regional	Active
115	EDU	Bosco Didattico del Cimino	12	56	56048	C	na	Fixed (one)	Forest	Private-no profit	civil society/grass roots	Permanent	Website	General public	NA	0	0	1	0	1	0	0	0	0	0	0	1	1	0	0	Local	Active
116	EDU	Bosco Didattico del Felcino	10	54	54039	C	na	Fixed (one)	mixed/non specified	Public	Governance/public bodies	Permanent	Website	General public	Both	0	0	1	0	1	0	0	0	0	0	0	1	1	0	0	Local	Active
117	EDU	Piccolo Paradiso - Bosco Didattico	12	58	58088	B	2006	Fixed (one)	mixed/non specified	Private-no profit	civil society/grass roots	Permanent	Website	Specific target	Assisted	0	0	1	0	0	0	0	0	0	0	0	0	1	0	0	Local	Active
118	EDU	Bosco Didattico - Masseria La Torre	16	75	75039	C	1997	Fixed (one)	mixed/non specified	Private-business	civil society/grass roots	Permanent	Website	Specific target	Assisted	0	0	1	0	0	0	0	0	0	0	0	1	1	0	0	Local	Active
119	WELL	Yoga nel Bosco - InMind	9	46	46002	D	na	Fixed (one)	Forest	Private-business	civil society/grass roots	Seasonal	Website	General public	Assisted	0	1	0	1	1	1	0	1	0	0	0	0	0	0	0	Local	Active
120	WELL	Lumina Milia	6	30	30003	D	2019	Fixed (one)	Forest	Public-private	civil society/grass roots	Event	Website	General public	Both	1	1	0	0	0	1	0	1	1	0	0	0	0	0	0	Local	Design Phase
121	WILD	Bosco Park	5	23	23011	D	na	Fixed (one)	Forest	Private-business	civil society/grass roots	Permanent	Website	General public	Both	0	0	1	1	1	1	0	0	0	0	0	0	0	0	0	Local	Active
122	WELL	kneipp Val di Rabbi	4	22	22150	D	na	Fixed (one)	mixed/non specified	Private-business	Mixed	Seasonal	Website	General public	Self-lead	1	0	0	0	1	0	0	1	0	0	0	0	0	0	0	Local	Active
123	WELL	Percorso detox	4	22	22150	D	2020	Fixed (one)	Forest	Private-business	Mixed	Seasonal	Grey literature	General public	Self-lead	1	1	1	1	1	1	0	1	0	0	0	0	0	0	0	Local	Design Phase
124	WELL	Park Therapy	4	22	22150	D	2019	Fixed (more than one)	Forest	Private-business	Mixed	Seasonal	Grey literature	General public	Both	1	1	0	0	1	0	0	1	0	0	0	0	0	0	0	Local	Active
125	WELL	percorso sensoriale Sora L'aha	4	22	22176	D	2019	Fixed (one)	Forest	Private-no profit	civil society/grass roots	Seasonal	Grey literature	General public	Self-lead	1	1	0	1	1	1	0	1	0	0	0	0	0	0	0	Local	Active
126	FT	Parco Metabolico	6	93	93010	B	2011	Fixed (more than one)	mixed/non specified	Private-no profit	civil society/grass roots	Permanent	Personal contact	General public	Both	1	0	0	1	0	0	1	0	0	0	0	0	0	0	0	Regional	Active
127	WELL	Mindfulness nel Bosco	3	16	16052	A	2018	Itinerant	Forest	Private-business	civil society/grass roots	Event	Website	General public	Assisted	0	1	1	0	0	0	0	1	0	0	0	0	0	0	0	Local	Abandoned
128	WELL	Mindfulness nel Bosco	3	15	15130	A	2017	Fixed (one)	mixed/non specified	Private-business	civil society/grass roots	Event	Website	General public	Assisted	0	1	1	0	0	0	1	1	0	0	0	0	0	0	0	Local	Unknown
129	WELL	Bagno di Bosco - Training	9	47	47012	B	na	Itinerant	mixed/non specified	Private-no profit	civil society/grass roots	Permanent	Website	General public	Assisted	1	1	1	0	0	0	0	1	1	0	0	1	0	1	0	Regional	Active
130	WELL	Percorso shinrin-yoku	1	5	5082	C	2019	Itinerant	mixed/non specified	Private-business	civil society/grass roots	Event	Website	General public	Assisted	1	1	1	0	1	0	0	1	1	0	0	0	0	0	0	Local	Active
131	ART	Sentieri Sonori	5	28	28060	A	2020	Itinerant	Forest	Private-no profit	civil society/grass roots	Seasonal	Website	General public	Assisted	0	0	1	1	1	1	0	0	0	0	0	1	0	0	0	Local	Active
132	EDU	Centri Estivi	5	28	28060	A	2020	Fixed (one)	mixed/non specified	Private-no profit	civil society/grass roots	Seasonal	Personal contact	Specific target	Assisted	1	1	1	0	0	1	0	0	0	0	0	1	1	0	0	Local	Active
133	SI	Monviso oltre le sbarre	1	4	4157	na	2004	Itinerant	Forest	Public	Governance/public bodies	Event/Project	Personal contact	Special needs	Assisted	0	0	1	0	0	0	1	0	0	0	1	0	0	0	0	Local	Abandoned
134	SI	Lavorare insieme	9	45	45003	A	2016	Itinerant	mixed/non specified	Public-private	Mixed	Event/Project	Website	Special needs	Assisted	0	0	1	0	0	0	1	0	0	0	1	0	0	0	0	Local	Abandoned
135	EDU	La Scuola nel Bosco (Forestas)	20	111	111014	D	2015	Fixed (one)	Forest	Public	Academic/tecnical bodies	Event/Project	Personal contact	Specific target	Assisted	0	0	1	0	0	1	0	0	0	0	0	0	1	0	0	Local	Unknown
136	SI	-	13	68	68019	D	2017	Itinerant	mixed/non specified	Public	Mixed	Permanent	Website	Special needs	Assisted	0	0	1	0	0	0	1	0	0	0	1	0	0	0	0	Regional	Abandoned
137	WELL	Wild wisdom	na	na	na	na	2018	Itinerant	mixed/non specified	Private-business	civil society/grass roots	Event	Website	General public	Assisted	1	1	0	0	0	1	0	1	1	0	0	0	1	0	0	National	Active
138	WELL	Giornata immersione nel bosco	9	47	47014	A	na	Fixed (one)	mixed/non specified	Private-business	civil society/grass roots	Event	Website	General public	Assisted	1	1	1	0	1	0	0	1	0	0	0	0	0	0	0	Local	Unknown
139	WELL	Le Naturolistiche	8	37	37027	D	2020	Itinerant	Forest	Private-no profit	civil society/grass roots	Permanent	Website	General public	Assisted	1	1	1	0	0	0	0	1	1	1	0	0	0	1	0	Local	Active
140	EDU	Vita da Elfi - residenze	20	92	92009	A	na	Itinerant	Forest	Private-no profit	civil society/grass roots	Permanent	Website	Specific target	Assisted	0	0	1	0	1	1	0	0	0	1	0	1	1	0	0	Local	Active
141	EDU	ALBERO MAESTRO	7	10	10046	A	2015	Itinerant	mixed/non specified	Private-no profit	civil society/grass roots	Permanent	Website	Specific target	Assisted	0	0	1	0	0	1	0	0	0	1	0	0	1	0	0	Local	Active
142	EDU	ASILO BOSCO CAFFARELLA	12	58	58091	A	na	Fixed (one)	Park	Private-no profit	civil society/grass roots	Permanent	Website	Specific target	Assisted	0	0	1	0	0	1	0	0	0	0	0	0	1	0	0	Local	Active
143	EDU	ASILO CIRIPì	9	48	48019	B	2014	Fixed (one)	mixed/non specified	Private-no profit	civil society/grass roots	-	Website	Specific target	Assisted	0	0	1	0	0	1	0	0	0	1	0	0	1	0	0	Local	Active
144	EDU	ASILO E SCUOLA NEL BOSCO ACIREALE + A CASA DI MOMO	19	92	87004	C	2013	Fixed (one)	mixed/non specified	Private-no profit	civil society/grass roots	Permanent	Website	Specific target	Assisted	0	0	1	0	0	1	0	0	0	0	0	0	1	0	0	Local	Active
145	EDU	ASILO ED ELEMENTARI NEL BOSCO DI FIESOLE (FIRENZE)	9	48	48015	C	2016	Fixed (one)	mixed/non specified	Private-business	civil society/grass roots	-	Website	Specific target	Assisted	0	0	1	0	0	1	0	0	0	0	0	0	1	0	0	Local	Active
146	EDU	ASILO NEL BOSCO APPIA TRA ARTE E NATURA	12	58	58091	A	2016	-	Park	Private-no profit	civil society/grass roots	-	Website	Specific target	Assisted	0	0	1	0	0	1	0	0	0	0	0	0	1	0	0	Local	Active
147	EDU	ASILO NEL BOSCO DEL CASENTINO	9	51	51031	D	2015	Fixed (one)	Forest	Private-no profit	Mixed	Permanent	Website	Specific target	Assisted	0	0	1	0	0	1	0	0	0	1	0	0	1	0	0	Local	Active
148	EDU	ASILO NEL BOSCO DI APRILIA	12	59	59001	B	2018	Fixed (one)	mixed/non specified	Private-no profit	civil society/grass roots	Permanent	Website	Specific target	Assisted	0	0	1	0	0	1	0	0	0	1	0	0	1	0	0	Local	Active
149	EDU	ASILO NEL BOSCO DI ARONA	1	3	3008	A	2016	-	mixed/non specified	Private-no profit	civil society/grass roots	Permanent	Website	Specific target	Assisted	0	0	1	0	0	1	0	0	0	1	0	0	1	0	0	Local	Active
150	EDU	ASILO NEL BOSCO DI ALTAVILLA VICENTINA	5	24	24004	B	2016	-	mixed/non specified	Private-no profit	civil society/grass roots	Seasonal	Website	Specific target	Assisted	0	0	1	0	0	1	0	0	0	0	0	0	1	0	0	Local	Active
151	EDU	ASILO NEL BOSCO PIANFEI	1	4	4165	C	2016	-	mixed/non specified	Private-no profit	civil society/grass roots	-	Website	Specific target	Assisted	0	0	1	0	0	1	0	0	0	0	0	0	1	0	0	Local	Active
152	EDU	ATELIER NEL BOSCO	19	92	87015	A	2016	Fixed (one)	mixed/non specified	Private-business	civil society/grass roots	Permanent	Website	Specific target	Assisted	0	0	1	0	0	1	0	0	0	1	0	0	1	0	0	Local	Active
153	EDU	comunità educante asilo nel bosco genova	7	10	10025	A	2015	Fixed (one)	Forest	Private-no profit	civil society/grass roots	Permanent	Website	Specific target	Both	0	0	1	0	0	1	0	0	0	1	0	0	1	0	0	Local	Active
154	EDU	CASA NEL BOSCO - SCUOLA MATERNA LA COCCINELLA	1	1	1078	A	2014	Fixed (one)	Park	Private-no profit	civil society/grass roots	Permanent	Website	Specific target	Assisted	0	0	1	0	0	1	0	0	0	1	0	0	1	0	0	Local	Active
155	EDU	CASTAGNE MATTE	3	15	15146	A	2017	Fixed (one)	Park	Private-no profit	civil society/grass roots	Seasonal	Website	Specific target	Assisted	0	0	1	0	0	1	0	0	0	0	0	0	1	0	0	Local	Abandoned
156	EDU	COCCODè	19	92	87009	D	2016	-	mixed/non specified	Private-no profit	civil society/grass roots	Permanent	Website	Specific target	Assisted	0	0	1	0	0	1	0	0	0	0	0	0	1	0	0	Local	Active
157	EDU	COLORIAMO LA TERRA - ASILO NEL BOSCO SIRACUSA	19	89	89017	A	2013	-	mixed/non specified	Private-no profit	civil society/grass roots	Permanent	Website	Specific target	Assisted	0	0	1	1	0	1	0	0	0	0	0	0	1	0	0	Local	Active
158	EDU	COME TETTO IL CIELO	3	16	16024	A	2017	Fixed (one)	mixed/non specified	Private-no profit	civil society/grass roots	Permanent	Website	Specific target	Assisted	0	0	1	0	0	1	0	0	0	0	0	0	1	0	0	Local	Active
159	EDU	CRESCERE NEL BOSCO (ASILO E PRIMARIA)	12	58	58070	B	2015	-	mixed/non specified	Private-no profit	civil society/grass roots	Permanent	Website	Specific target	Assisted	0	0	1	0	0	1	0	0	0	0	0	0	1	0	0	Local	Active
160	EDU	La Scuola Nel Bosco	8	37	37008	A	2010	Fixed (one)	Park	Public-private	Governance/public bodies	Permanent	Website	Specific target	Assisted	0	0	1	0	1	1	0	0	0	1	0	1	1	0	0	Local	Active
161	EDU	FUORI DALLA SCUOLA	3	97	97049	A	2015	Fixed (one)	mixed/non specified	Private-no profit	civil society/grass roots	Permanent	Website	Specific target	Assisted	0	0	1	0	0	1	0	1	0	0	0	0	1	0	0	Local	Active
162	EDU	GHIANDA	3	15	15146	A	2016	Fixed (one)	Park	Private-no profit	civil society/grass roots	Permanent	Website	Specific target	Assisted	0	0	1	0	0	1	0	0	0	0	0	0	1	0	0	Local	Active
163	EDU	GIROTONO DELLE ETA	5	26	26073	B	2016	Fixed (one)	mixed/non specified	Private-no profit	civil society/grass roots	Permanent	Website	Specific target	Assisted	0	0	1	0	0	1	0	0	0	1	1	0	1	0	0	Local	Active
164	EDU	GOCCIA DOPO GOCCIA	3	12	12036	A	2016	-	mixed/non specified	Private-no profit	civil society/grass roots	Permanent	Website	Specific target	Assisted	0	0	1	0	0	1	0	0	0	0	0	0	1	0	0	Local	Active
165	EDU	I PASSEROTTI - NIDO E SCUOLA ALL'APERTO	8	37	37009	A	2015	Fixed (one)	mixed/non specified	Private-no profit	civil society/grass roots	Permanent	Website	Specific target	Assisted	0	0	1	1	0	1	0	0	0	0	0	1	1	0	0	Local	Active
166	EDU	IL BOSCO DEGLI ALLORI	12	58	58091	A	2017	-	Park	Private-no profit	civil society/grass roots	Permanent	Website	Specific target	Assisted	0	0	1	0	0	1	0	0	0	0	0	0	1	0	0	Local	Active
167	EDU	IL BOSCO DEI PICCOLI	1	96	96075	D	2015	Itinerant	mixed/non specified	Private-no profit	civil society/grass roots	Permanent	Website	Specific target	Assisted	0	0	1	1	0	1	0	0	0	0	0	1	1	0	0	Local	Active
168	EDU	IL BOSCO DEI PICCOLI	12	58	58042	C	2017	Itinerant	mixed/non specified	Private-no profit	civil society/grass roots	Permanent	Website	Specific target	Assisted	0	0	1	0	0	1	0	0	0	1	0	0	1	0	0	Local	Active
169	EDU	IL BOSCO DI GHIGNARELLI	3	108	108008	A	2016	Fixed (one)	Park	Private-no profit	civil society/grass roots	Permanent	Website	Specific target	Self-lead	0	0	1	0	0	1	0	0	0	0	0	0	1	0	0	Local	Active
170	EDU	IL BOSCO GRANDE IL BOSCO DEI PICCOLI	3	18	18110	A	1999	Fixed (one)	Park	Private-no profit	civil society/grass roots	Permanent	Website	Specific target	Assisted	0	0	1	0	0	1	0	0	0	0	0	0	1	0	0	Local	Active
171	EDU	NIDO ORMA	8	37	37011	C	2018	Fixed (one)	Park	Private-no profit	civil society/grass roots	Permanent	Website	Specific target	Assisted	0	0	1	0	0	1	0	0	0	0	0	0	1	0	0	Local	Active
172	EDU	L’Albero Maestro	12	58	58111	B	2018	-	mixed/non specified	Private-no profit	civil society/grass roots	Permanent	Website	Specific target	Assisted	0	0	1	0	0	1	0	0	0	0	0	0	1	0	0	Local	Active
173	EDU	LA CASA DELLA LUMACA	11	41	41029	C	2016	Fixed (one)	mixed/non specified	Private-no profit	civil society/grass roots	Permanent	Website	Specific target	Assisted	0	0	1	0	0	1	0	0	0	0	0	0	1	0	0	Local	Active
174	EDU	LA SCUOLA NEL BOSCO A PARCO TALON	8	37	37012	C	2011	Fixed (one)	Park	Private-no profit	civil society/grass roots	Permanent	Website	Specific target	Assisted	0	0	1	0	0	1	0	0	0	0	0	0	1	0	0	Local	Abandoned
175	EDU	LA SCUOLA NEL BOSCO CELLULOSA	12	58	58091	A	2014	Fixed (one)	Park	Public-private	Mixed	Permanent	Website	Specific target	Assisted	0	0	1	0	0	1	0	0	0	0	0	0	1	0	0	Local	Active
176	EDU	Il Sentiero delle Lucciole	3	98	98031	A	2017	Itinerant	mixed/non specified	Private-no profit	civil society/grass roots	Permanent	Website	Specific target	Assisted	0	0	1	0	0	1	0	0	0	0	0	0	1	0	0	Local	Active
177	EDU	LA YURTA NEL BOSCO	1	3	3009	A	2013	Itinerant	mixed/non specified	Private-no profit	civil society/grass roots	Permanent	Website	Specific target	Assisted	0	0	1	0	0	1	0	0	0	0	0	0	1	0	0	Local	Active
178	EDU	L'ASILO NEL BOSCO DI OSTIA ANTICA + PICCOLA POLIS (PRIMARIA)	12	58	58091	A	2013	Fixed (one)	mixed/non specified	Private-no profit	civil society/grass roots	Permanent	Website	Specific target	Assisted	0	0	1	0	0	1	0	0	0	0	0	0	1	0	0	National	Active
179	EDU	Asiletto Nel Bosco	8	34	34038	C	2014	Itinerant	mixed/non specified	Private-no profit	civil society/grass roots	Permanent	Website	Specific target	Assisted	0	0	1	0	0	1	0	0	0	0	0	1	1	0	0	Local	Active
180	EDU	LE GIUGGIOLE	8	99	99014	B	2017	-	mixed/non specified	Private-no profit	civil society/grass roots	Permanent	Website	Specific target	Assisted	0	0	1	1	0	1	0	0	0	0	0	0	1	0	0	Local	Active
181	EDU	Agrinido LO SPAVENTAPASSERI	9	46	46009	D	2012	Fixed (one)	mixed/non specified	Private-business	civil society/grass roots	Permanent	Website	Specific target	Assisted	0	0	1	0	0	1	0	0	0	0	1	0	1	0	0	Local	Active
182	EDU	MADRE NATURA	9	48	48033	C	2016	Itinerant	mixed/non specified	Private-no profit	civil society/grass roots	Permanent	Website	Specific target	Assisted	0	0	1	0	0	1	0	0	0	0	0	0	1	0	0	Local	Active
183	EDU	MAESTRA NATURA	11	41	41067	C	2017	Itinerant	mixed/non specified	Private-no profit	civil society/grass roots	Seasonal	Website	Specific target	Assisted	0	0	1	0	0	1	0	1	0	0	0	1	1	0	0	Local	Active
184	EDU	OPEN DOOR	11	41	41044	A	2017	Fixed (one)	mixed/non specified	Private-no profit	civil society/grass roots	Seasonal	Website	Specific target	Assisted	0	0	1	0	0	1	0	0	0	0	0	0	1	0	0	Local	Unknown
185	EDU	OTTAVIA OUTDOOR	9	49	49007	C	2017	-	mixed/non specified	Private-no profit	civil society/grass roots	Seasonal	Website	Specific target	Assisted	0	0	1	0	0	1	0	0	0	0	0	0	1	0	0	Local	Active
186	EDU	“Centro di educazione motoria “Piccoli Passi”	19	89	89013	C	2013	Fixed (one)	mixed/non specified	Private-no profit	civil society/grass roots	Seasonal	Website	Specific target	Assisted	1	0	1	1	0	1	1	0	0	0	1	0	1	0	0	Local	Active
187	EDU	PIEDINI VERDI	16	72	72025	C	2017	-	mixed/non specified	Private-no profit	civil society/grass roots	Seasonal	Website	Specific target	Assisted	0	0	1	0	0	1	0	0	0	0	0	0	1	0	0	Local	Active
188	EDU	SAMARA	3	108	108040	A	2016	Fixed (one)	Park	Private-no profit	civil society/grass roots	Seasonal	Website	Specific target	Assisted	0	0	1	0	0	1	0	0	0	0	0	0	1	0	0	Local	Active
189	EDU	SCUOLA NEL BOSCO DEI CONIGLI	12	58	58007	A	2015	-	mixed/non specified	Public-private	Mixed	Seasonal	Website	Specific target	Assisted	0	0	1	0	0	1	0	0	0	0	0	0	1	0	0	Local	Active
190	EDU	SCUOLA NEL BOSCO DEL LAGO DI FIMON	5	24	24006	B	2017	Itinerant	mixed/non specified	Private-no profit	civil society/grass roots	Seasonal	Website	Specific target	Assisted	0	0	1	0	0	1	0	0	0	0	0	0	1	0	0	Local	Active
191	EDU	SCUOLA NEL BOSCO DI PIANORO	8	37	37047	C	2017	Fixed (more than one)	mixed/non specified	Private-business	civil society/grass roots	Seasonal	Website	Specific target	Assisted	0	0	1	0	0	1	0	0	0	0	0	0	1	0	0	Local	Active
192	EDU	SCUOLA NEL BOSCO DI PRIABONA	5	24	24063	B	2018	Itinerant	mixed/non specified	Private-no profit	civil society/grass roots	Permanent	Website	Specific target	Assisted	0	0	1	0	0	1	0	0	0	0	0	0	1	0	0	Local	Active
193	EDU	SCUOLA NEL BOSCO DI RIVA DEL GARDA	4	22	22153	D	2016	Itinerant	Forest	Private-no profit	civil society/grass roots	Permanent	Website	Specific target	Assisted	0	0	1	0	0	1	0	0	0	0	0	0	1	0	0	Local	Active
194	EDU	SCUOLA NEL BOSCO DI RUBANO	5	28	28072	B	2017	Itinerant	Forest	Private-no profit	civil society/grass roots	Permanent	Website	Specific target	Assisted	0	0	1	0	0	1	0	0	0	0	0	0	1	0	0	Local	Active
195	EDU	SCUOLA NEL BOSCO DI VALLELAGHI	4	22	22248	na	2018	Itinerant	Forest	Private-no profit	civil society/grass roots	Permanent	Website	Specific target	Assisted	0	0	1	0	0	1	0	0	0	0	0	0	1	0	0	Local	Active
196	EDU	SCUOLA NEL BOSCO DI VERONA - La valverde	5	23	23091	A	2015	Fixed (one)	Forest	Private-no profit	civil society/grass roots	Permanent	Website	Specific target	Assisted	0	0	1	0	0	1	0	0	0	0	0	0	1	0	0	Local	Active
197	EDU	SOGNABOSCO	5	24	24057	B	2017	Fixed (one)	mixed/non specified	Private-no profit	civil society/grass roots	Permanent	Website	Specific target	Assisted	0	0	1	0	0	1	0	0	0	0	0	0	1	0	0	Local	Unknown
198	EDU	SPAZIO BIMBI LA CHIOCCIOLA	8	37	37011	C	2015	-	mixed/non specified	Private-no profit	civil society/grass roots	Permanent	Website	Specific target	Assisted	0	0	1	0	0	1	0	0	0	0	0	0	1	0	0	Local	Abandoned
199	EDU	TUSCHOLé	12	58	58046	B	2015	-	mixed/non specified	Private-no profit	civil society/grass roots	Permanent	Website	Specific target	Assisted	0	0	1	0	0	1	0	0	0	0	0	0	1	0	0	Local	Active
200	EDU	ZUCCABà	8	40	40003	B	2016	-	mixed/non specified	Private-no profit	civil society/grass roots	Permanent	Website	Specific target	Assisted	0	0	1	0	0	1	0	0	0	0	0	0	1	0	0	Local	Abandoned
201	EDU	BIRKENWALD	4	21	21062	D	2016	-	mixed/non specified	Private-no profit	civil society/grass roots	Permanent	Website	Specific target	Assisted	0	0	1	0	0	1	0	0	0	0	0	0	1	0	0	Local	Active
202	EDU	SCUOLA POGGIO D'ORO	9	52	52014	C	2016	-	mixed/non specified	Private-no profit	civil society/grass roots	Permanent	Website	Specific target	Assisted	0	0	1	0	0	1	0	0	0	0	0	0	1	0	0	Local	Unknown
203	EDU	Asilo nel Bosco Fattoria Emoyeni	20	92	92105	C	2017	Fixed (one)	mixed/non specified	Private-no profit	civil society/grass roots	Permanent	Website	Specific target	Assisted	0	0	1	0	0	1	0	0	0	0	0	0	1	0	0	Local	Active
204	EDU	Centro Educativo Ecopedagocico nel Bosco	13	69	69022	A	2016	-	mixed/non specified	Private-no profit	civil society/grass roots	Seasonal	Website	Specific target	Assisted	0	1	1	0	1	1	0	1	0	1	0	1	1	0	0	Local	Active
205	EDU	L'AgriCultura (nido,asilo, scuola)	1	96	96075	D	2015	-	Forest	Private-no profit	civil society/grass roots	Permanent	Website	Specific target	Assisted	1	1	1	0	0	1	0	0	0	0	0	1	1	0	0	Local	Active
206	EDU	"Crescere nel Bosco"	5	24	24095	B	2019	Fixed (one)	Forest	Private-no profit	civil society/grass roots	Permanent	Website	Specific target	Assisted	0	0	1	0	0	1	0	0	0	1	0	1	1	0	0	Local	Active
207	EDU	A.P.E. nel Bosco - RAdiCI	13	67	67041	A	2019	Fixed (one)	mixed/non specified	Private-no profit	Mixed	Event/Project	Website	Specific target	Assisted	0	0	1	0	0	0	0	0	0	1	1	1	1	0	0	Regional	Active
208	EDU	Nature Rock	9	50	50022	C	na	Itinerant	mixed/non specified	Private-business	civil society/grass roots	Permanent	Website	Specific target	Assisted	1	1	1	1	0	1	0	0	0	0	0	1	1	1	0	Local	Active
209	WILD	Giochi tra gli alberi	na	na	na	na	2018	Itinerant	Forest	Private-no profit	civil society/grass roots	Permanent	Website	Specific target	Assisted	1	0	1	1	1	1	0	0	0	0	0	0	0	0	0	Local	Active
210	EDU	Scintille di Sale - Comunità educante	3	12	12140	A	2018	-	Forest	Private-no profit	civil society/grass roots	Permanent	Website	Specific target	Assisted	0	1	1	0	0	1	0	0	0	1	0	1	1	0	0	Local	Active
211	SI	Montagna Terapia - Cai Padova	5	28	28060	A	2015	Itinerant	mixed/non specified	Private-no profit	Mixed	Permanent	Personal contact	Special needs	Assisted	1	1	1	1	0	1	1	0	0	1	1	0	0	0	0	Regional	Active
212	SI	Montagna senza barriere	13	69	69045	D	2019	Itinerant	mixed/non specified	Private-no profit	Mixed	Event	Website	Special needs	Assisted	0	0	1	1	0	1	0	0	0	1	1	0	1	0	0	Regional	Active
213	SI	Montagna terapia sezione milano	3	15	15146	A	2018	Itinerant	mixed/non specified	Private-no profit	Mixed	Permanent	Website	Special needs	Assisted	1	1	1	1	0	1	1	0	0	1	1	0	0	0	0	Regional	Active
214	SI	Passaggio Chiave	3	na	na	na	2015	Itinerant	mixed/non specified	Private-no profit	Mixed	Network/Research	Website	Special needs	Assisted	1	1	1	1	0	0	1	0	0	1	1	0	1	0	0	Regional	Active
215	SI	Montagna terapia - cai parma	8	34	34027	B	2010	Itinerant	mixed/non specified	Private-no profit	Mixed	Permanent	Website	Special needs	Assisted	0	1	1	1	0	0	1	0	0	1	1	0	1	0	0	Regional	Active	1
216	SI	La montagna che aiuta	1	1	1272	A	na	Itinerant	mixed/non specified	Private-no profit	Governance/public bodies	Permanent	Website	Special needs	Assisted	0	1	1	1	0	0	1	0	0	1	1	0	1	0	0	Regional	Active
217	SI	DIAB3KING	1	6	6003	A	2012	Itinerant	mixed/non specified	Private-no profit	civil society/grass roots	Event/Project	Grey literature	Special needs	Assisted	1	0	1	1	1	1	0	0	0	1	1	0	1	0	0	Regional	Active
218	SI	montagna terapia	1	6	6174	B	na	Itinerant	mixed/non specified	Private-no profit	civil society/grass roots	Event/Project	Website	Special needs	Assisted	1	1	1	1	0	0	1	0	0	1	1	0	0	0	0	Regional	Active
219	FT	Montagna Terapia	1	6	6004	A	2019	Itinerant	mixed/non specified	Private-no profit	Mixed	Event/Project	Website	Special needs	Assisted	1	1	1	1	0	0	1	0	0	1	1	0	0	0	0	Regional	Unknown
220	SI	Sopraimille	4	22	22153	D	2003	Itinerant	mixed/non specified	Private-no profit	civil society/grass roots	Permanent	Website	Special needs	Assisted	0	1	1	1	0	1	1	0	0	1	1	0	0	0	0	Regional	Active
221	SI	Legati ma liberi	6	93	93037	B	2013	Itinerant	mixed/non specified	Private-no profit	Mixed	Event/Project	Personal contact	Special needs	Assisted	0	1	1	1	0	1	1	0	0	1	1	0	0	0	0	Regional	Abandoned
222	SI	CAI LAZIO LH	12	58	58091	A	2014	Fixed (more than one)	mixed/non specified	Private-no profit	civil society/grass roots	Permanent	Website	Special needs	Assisted	0	0	1	1	1	1	0	0	0	1	1	0	0	0	0	Regional	Active
223	WELL	Barefooting - San Floriano	6	93	93037	B	2018	Fixed (one)	Park	Private-business	civil society/grass roots	Event/Project	Personal contact	General public	Assisted	1	1	1	1	1	0	0	1	0	0	0	0	0	0	0	Local	Active
224	FT	Sentieri di Libertà	20	111	111067	C	2006	Itinerant	mixed/non specified	Public-private	Mixed	Permanent	Grey literature	Special needs	Assisted	1	1	1	1	0	0	1	0	0	1	1	0	0	0	0	Local	Unknown
225	FT	Dance Well	4	22	22023	D	2018	Fixed (one)	Forest	Private-no profit	Mixed	Event/Project	Website	Special needs	Assisted	1	1	1	1	0	0	1	0	0	1	1	1	0	0	0	Regional	Abandoned
226	FT	Look of Life - Fondazione Ant	4	22	22024	D	2017	Fixed (one)	Forest	Private-no profit	civil society/grass roots	Event/Project	Website	Special needs	Assisted	1	1	1	0	0	0	1	1	0	0	0	0	0	0	0	Regional	Abandoned
227	EDU	Il Bosco dei Folletti	11	41	41066	C	na	Fixed (one)	Forest	Private-no profit	civil society/grass roots	Permanent	Website	Specific target	Both	0	0	1	0	1	1	0	0	0	0	0	0	1	0	0	Local	Active
228	FT	Oasi del Respiro	10	54	54034	D	2015	Fixed (more than one)	Forest	Public	Mixed	Event/Project	Grey literature	Mixed/non specified	Self-lead	1	0	1	1	1	0	1	0	0	0	0	0	0	0	0	Local	Abandoned
229	WELL	Bosco Sacro di Jesolo	5	27	27042	A	2000	Fixed (one)	Planted forest	Private-no profit	civil society/grass roots	Permanent	Website	Specific target	Both	0	0	1	0	0	0	0	0	1	0	0	0	0	0	0	Local	Unknown
230	WELL	Tempio Bosco Sacro Damanhur	1	1	1017	A	1975	Fixed (one)	Forest	Private-business	civil society/grass roots	Permanent	Personal contact	General public	Assisted	0	0	1	0	0	0	0	1	1	0	0	0	0	0	0	Local	Active
231	WELL	Dolomiti Natural Wellness	4	22	22143	D	na	Fixed (more than one)	Forest	Private-business	Mixed	seasonal	Website	General public	Assisted	1	1	0	1	1	0	0	1	0	0	0	0	0	0	0	Local	Active
232	WELL	-	2	7	7021	D	2020	Fixed (one)	mixed/non specified	Private-business	civil society/grass roots	Event/Project	Website	General public	Assisted	0	1	0	0	1	0	0	1	0	0	0	0	0	0	0	Local	Active
